# Supplementary material
Source: publisher figshare collection journal article supplement (https://tandf.figshare.com/articles/dataset/_/3159589)
Supplement: Supplementary file 1 [file 2]

Supplementary Material 3. Dental measurements (mm). Abbreviations: AP, anteroposterior length; TD, transverse diameter; TL, total length; W, width. (\*) Provisionally included.

| Species                      | Lower molars |      |      |      |      |      |      |      |        |      |
|------------------------------|--------------|------|------|------|------|------|------|------|--------|------|
|                              | Dp4          |      | m1   |      | m2   |      | m3   |      | Dp4-m3 | i1   |
|                              | AP           | W    | AP   | W    | AP   | W    | AP   | W    | TL     | TD   |
| <i>Ameghinomys constans</i>  |              |      |      |      |      |      |      |      |        |      |
| MLP 15-391                   | 2.30         | 1.16 | 2.10 | 1.56 | 2.20 | 1.56 | 2.25 | 1.23 | 8.80   | 1.44 |
| MLP 15-391c                  | 2.08         | 1.24 | 1.92 | 1.44 |      |      |      |      |        | 1.51 |
| MACN A 247 (248)             | 2.23         | 1.24 | 2.23 | 1.84 | 2.10 | 1.79 |      |      |        | 1.70 |
| MACN A 247                   |              |      | 1.96 | 1.52 | 2.07 | 1.55 |      |      |        |      |
| MACN A 4060                  | 2.29         | 1.29 | 2.03 | 1.71 | 2.37 | 1.84 | 2.05 | 1.50 | 8.68   | 1.40 |
| MACN A 4075                  | 1.93         | 1.17 | 1.83 | 1.45 |      |      |      |      |        |      |
| PVSJ 1083                    |              |      | 2.22 | 1.90 | 2.54 | 2.18 |      |      |        | 1.70 |
| PVSJ 1047                    |              |      | 2.18 | 1.72 | 2.25 | 1.78 | 2.00 | 1.67 |        | 1.40 |
| <i>Acarechimys pascuali</i>  |              |      |      |      |      |      |      |      |        |      |
| MLP 15-391a                  | 2.05         | 1.34 | 1.96 | 1.69 | 2.14 | 1.87 |      |      |        | 1.26 |
| MLP 15-391b                  |              |      | 1.98 | 1.54 | 2.13 | 2.00 | 1.87 |      |        | 1.28 |
| MACN A 4062                  | 1.74         | 1.10 | 1.84 | 1.64 | 1.90 | 1.86 | 1.84 | 1.64 | 7.0    |      |
| MACN A 4064                  | 1.84         | 1.02 | 1.86 | 1.40 | 1.92 | 1.62 |      |      |        |      |
| MACN A 4074                  | 1.87         | 1.10 | 1.94 | 1.51 |      |      |      |      |        | 1.20 |
| MACN A 4117                  | 1.86         | 1.18 | 1.83 | 1.63 | 2.03 | 1.75 |      |      |        | 1.20 |
| <i>Acarechimys minutus</i>   |              |      |      |      |      |      |      |      |        |      |
| MACN A 238                   |              |      | 1.81 | 1.40 | 1.80 | 1.63 | 1.70 | 1.31 |        | 1.20 |
| MLP 15-410a                  |              |      | 1.80 | 1.52 | 1.74 | 1.46 | 1.52 | 1.43 |        |      |
| MACN A 4058                  | 1.85         | 1.05 | 1.87 | 1.57 |      |      |      |      |        |      |
| MACN A 4263                  | 1.84         | 1.20 | 1.89 | 1.68 | 1.86 | 1.64 |      |      |        |      |
| MACN A 4065(*)               |              |      | 2.00 | 1.67 | 1.81 | 1.63 |      |      |        | 1.22 |
| <i>Acarechimys pulchelus</i> |              |      |      |      |      |      |      |      |        |      |
| MACN A 52-128                | 1.90         | 1.20 | 1.95 | 1.50 | 1.95 | 1.50 | 1.70 | 1.30 | 7.70   |      |
|                              | Upper molars |      |      |      |      |      |      |      |        |      |
|                              | DP4          |      | M1   |      | M2   |      | M3   |      |        |      |
|                              | AP           | W    | AP   | W    | AP   | W    | AP   | W    |        |      |
| <i>Ameghinomys constans</i>  |              |      |      |      |      |      |      |      |        |      |
| MLP 15-410b                  |              |      | 2.06 | 1.80 | 2.00 | 1.80 | 1.60 | 1.54 |        |      |
| <i>Acarechimys minutus</i>   |              |      |      |      |      |      |      |      |        |      |
| MACN A 4070                  | 1.60         | 1.60 | 1.84 | 1.76 | 1.84 | 1.82 | 1.48 | 1.62 | 6.95   |      |
