# Supplementary material
Source: publisher figshare collection journal article supplement (https://tandf.figshare.com/articles/dataset/_/3159589)
Supplement: Supplementary file 2 [file 2]

**Supplementary material 2.** Specimens analysed in this work for the first time and not mentioned in the text or in Verzi et al. (2016: Online Resource 2).

*Acarechimys leucotheae*: MPEF-PV 10677 (holotype). MPEF-PV 5065, MLP 90-II-13-150a, MLP 90-II-13-150b, MLP 90-II-13-150c, MLP 90-II-13-150d, MLP 90-II-13-150e, MLP 90-II-13-150f (n=2) (as “*Acarechimys*” *minutissimus* in Verzi et al. 2016: Online Resource 2).

*Acaremys minutissimus*: MLP 15-188 and MACN A 256, 257, 258 (sintypes de *Acaremys minutissimus*); MACN A 1894, 4073, 4077, 4079-4081, 4083, 4086-4090, 4092-4094, 4145-46 (sintypes of *Sciamys tenuissimus*), 4265-66 (sintypes of *Stichomys diminutus*), 10152, 10153, 10154a, 12683, MACN PV SC 4045, 4091, 2589.

**Gen. et sp. nov.:** MACN A 4071, 4072, 4082, MACN PV SC 2590.
